# Supplementary material for: The coumarin–pterocarpan conjugate – a natural product inspired hybrid molecular probe for DNA recognition
Source: Royal Society of Chemistry journal article supplement (doi:10.1039/c4ob01360c), 2014-01-01
Supplement: c4ob01360c1.pdf [file c4ob01360c1.pdf]

## Supplementary Content

### **Coumarin-Pterocarpan Conjugate- A Natural Product Inspired Hybrid Molecular Probe for DNA Recognition**

Shital K Chattopadhyay,\* Indranil Kundu, and Ratnava Maitra

*Department of Chemistry, University of Kalyani, Kalyani-741235, WestBengal, India, E-mail: [skchatto@yahoo.com](mailto:skchatto@yahoo.com)*

#### CONTENTS

|                                                                                             |           |
|---------------------------------------------------------------------------------------------|-----------|
| <sup>1</sup> H and <sup>13</sup> C spectra of compounds <b>3</b> and <b>4</b> -----         | pages 2-5 |
| Determination of Molar Extinction coefficient of compound <b>4</b><br>in buffer & DMSO----- | page 6    |
| Determination of quantum yield of compound <b>4</b> -----                                   | page 7    |
| Co-ordinates of standard orientation of <b>4</b> obtained from DFT calculation-----         | page 8    |
| Fluorescence titration of compound <b>4</b> with different nucleotides.....                 | Page 9-10 |
| Determination of detection limit of compound <b>4</b> .....                                 | page 11   |
| Fluorescence titration of compound <b>4</b> with a sequence of DNA.....                     | page 12   |

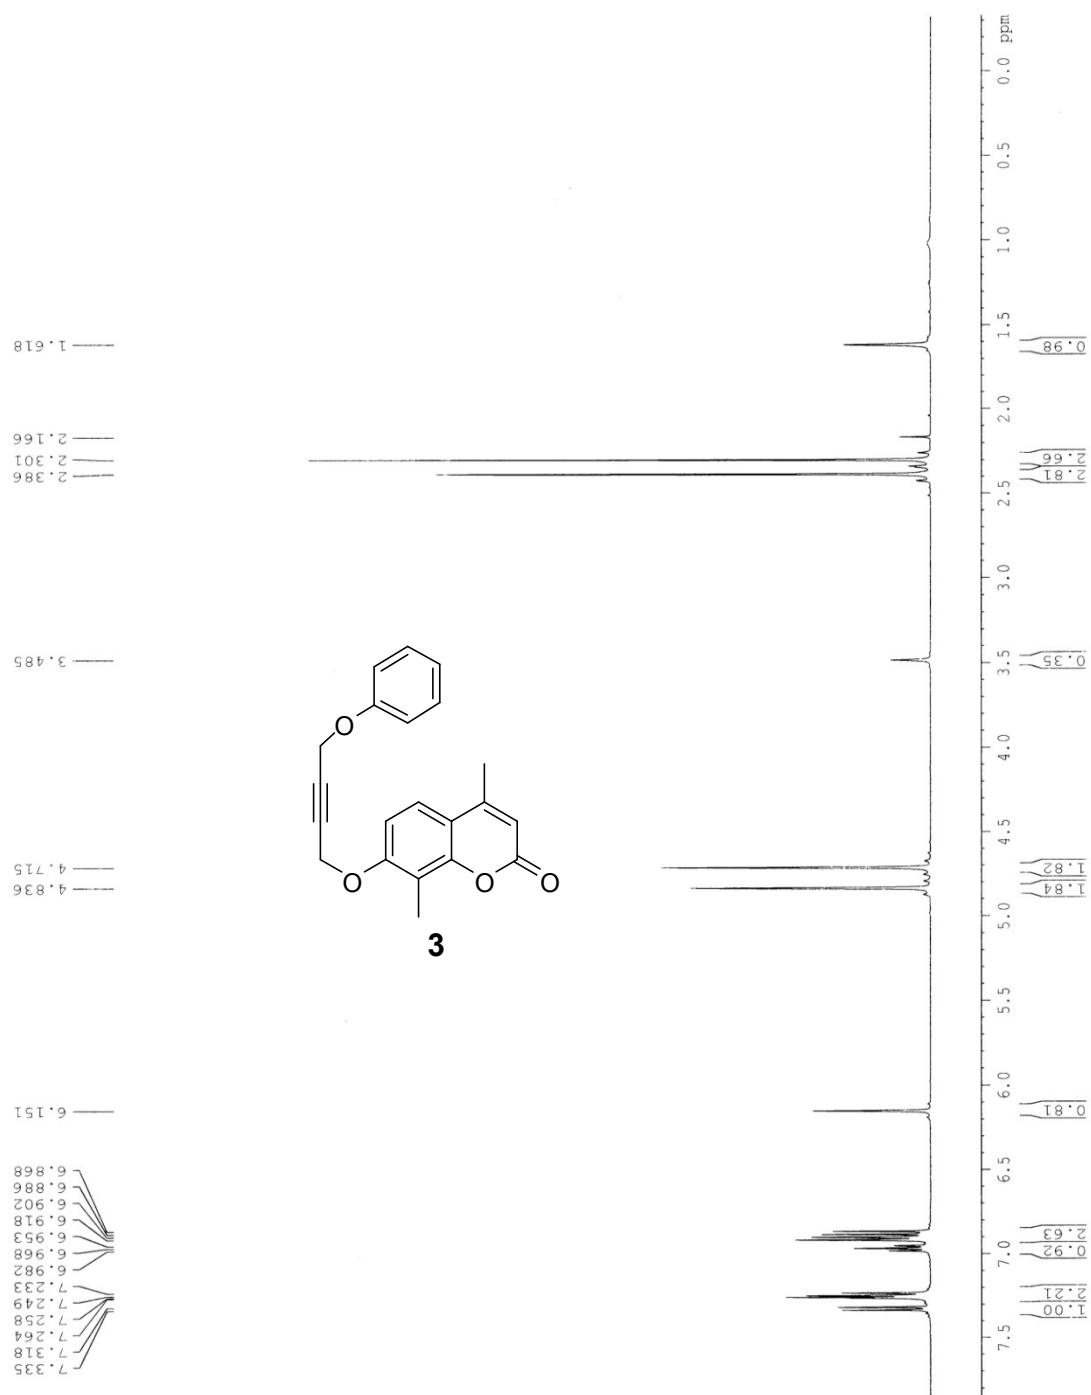

$^1\text{H}$  NMR spectrum (500 MHz,  $\text{CDCl}_3$ ) of compound **3**

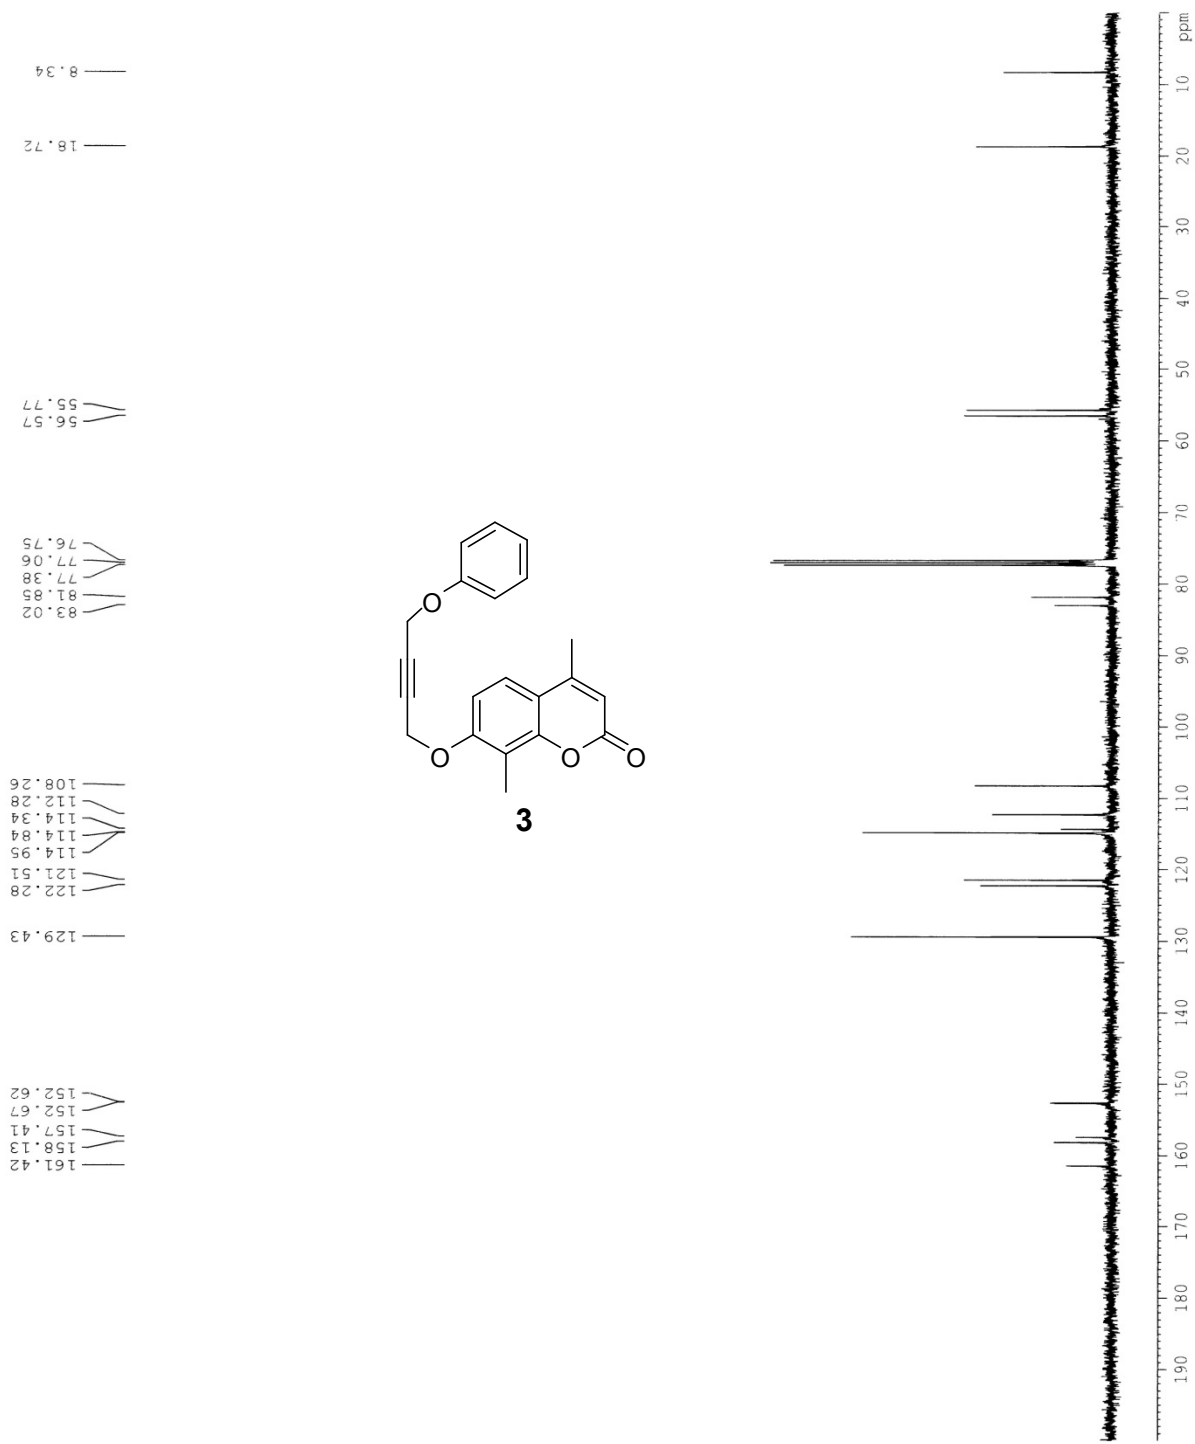

$^{13}\text{C}$  NMR spectrum (100 MHz,  $\text{CDCl}_3$ ) of compound **3**

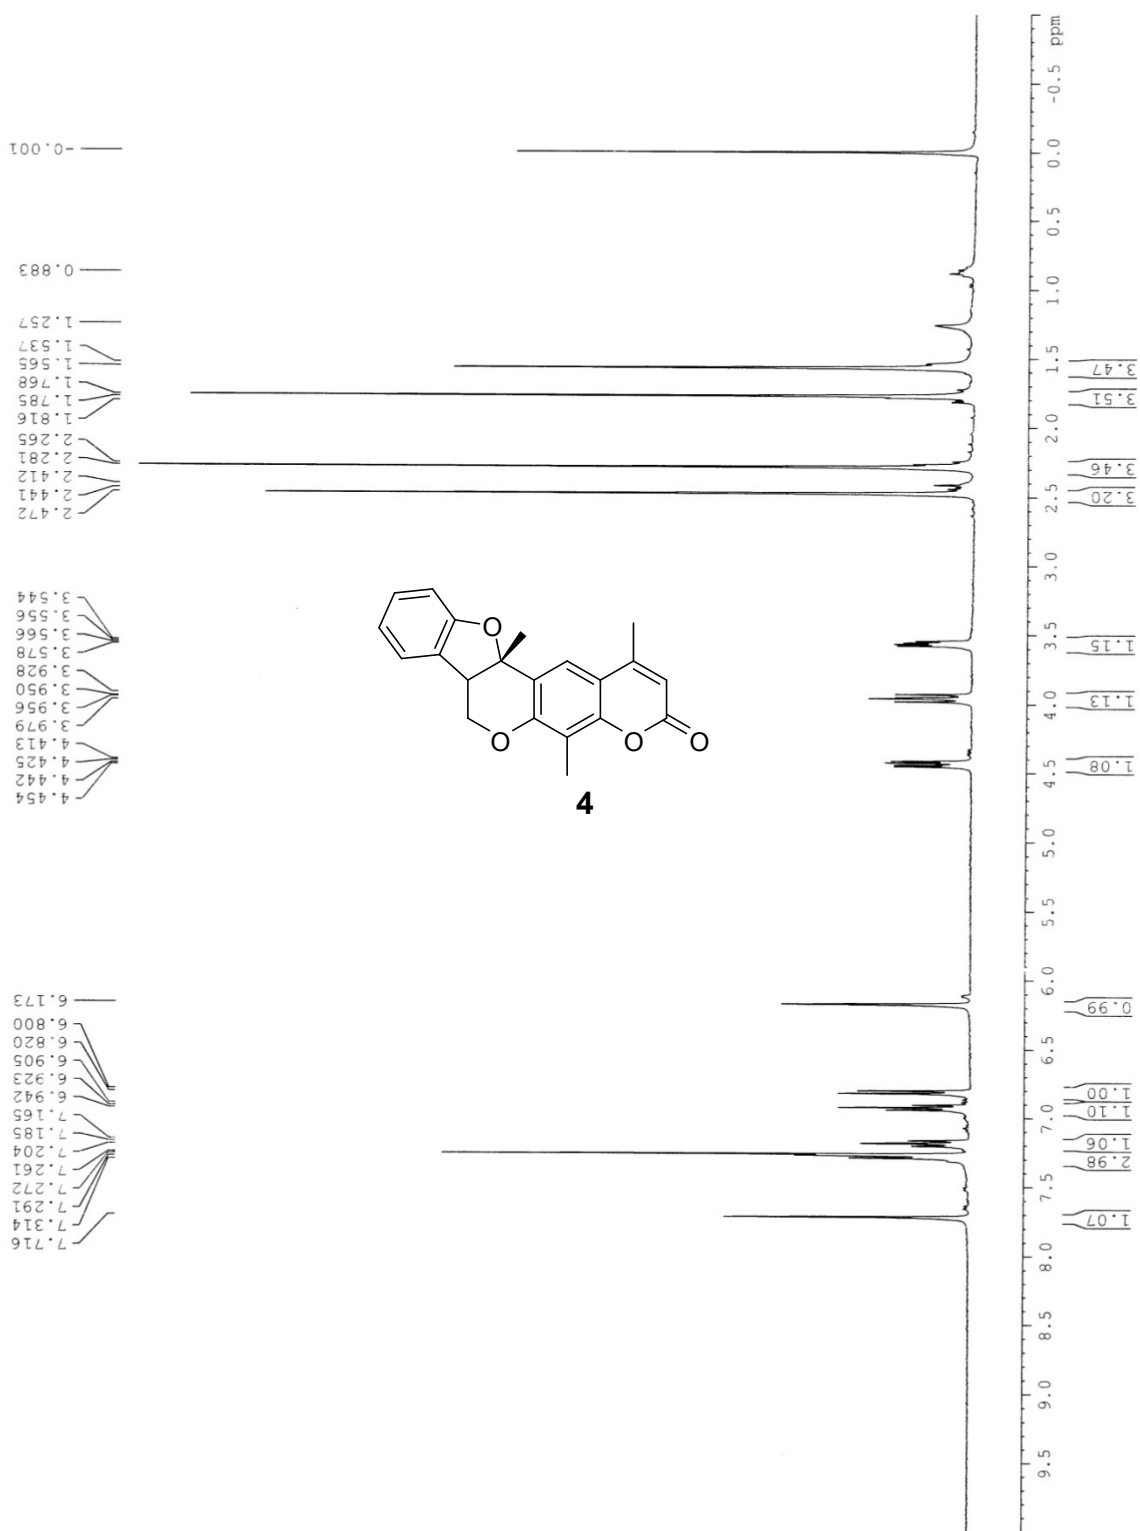

<sup>1</sup>H NMR spectrum (400 MHz, CDCl<sub>3</sub>) of compound 4

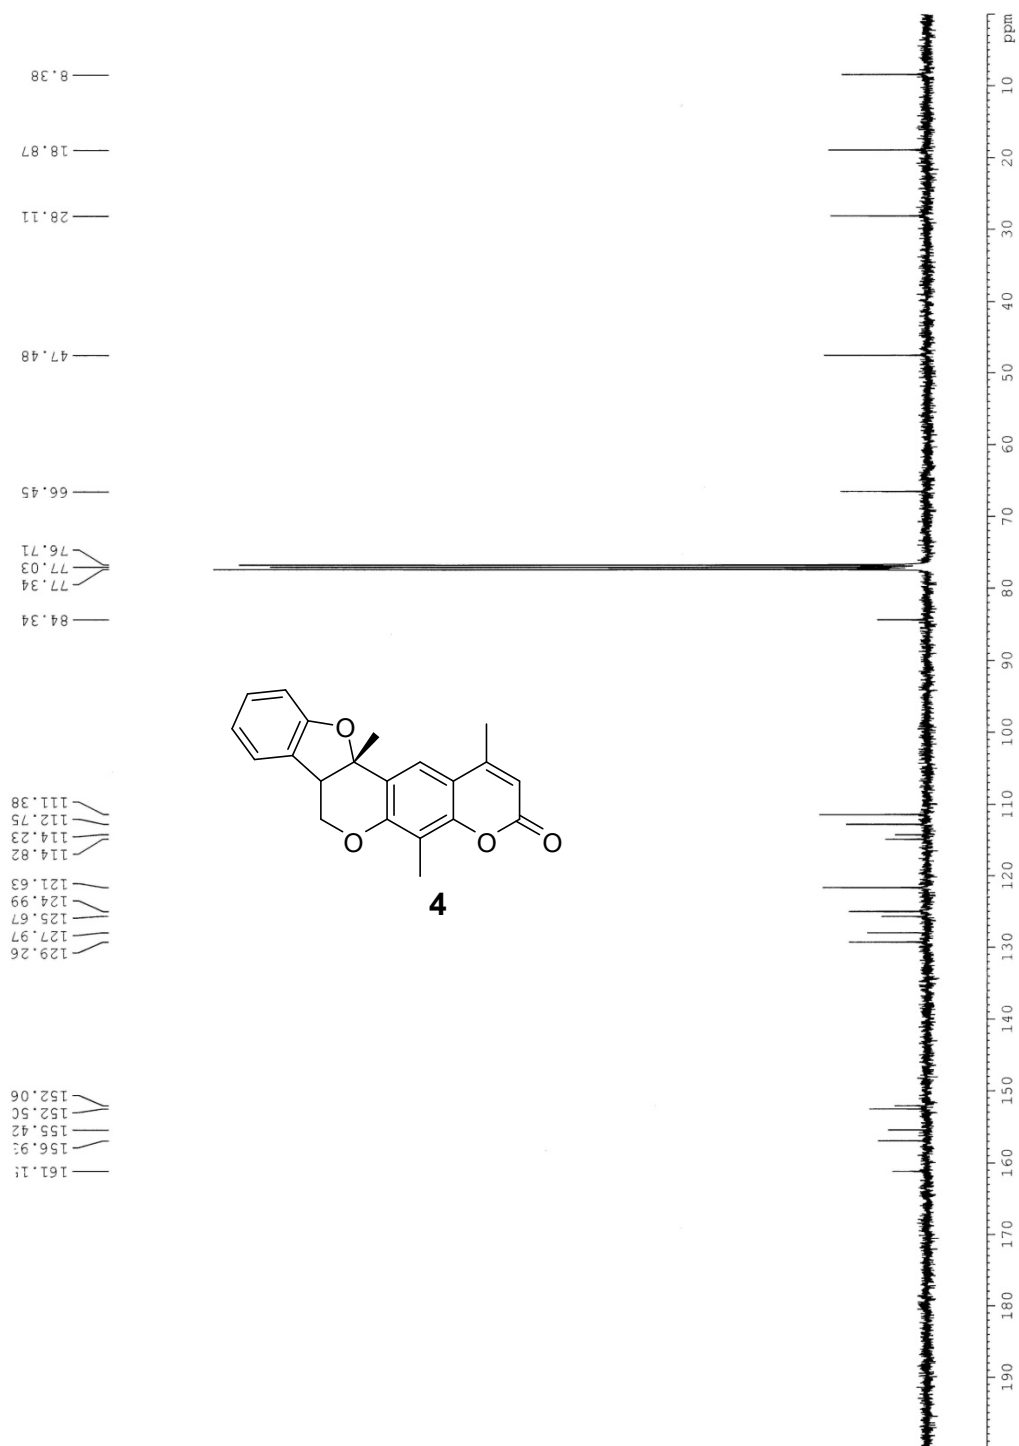

<sup>13</sup>C NMR spectrum (100 MHz, CDCl<sub>3</sub>) of compound 4

## Determination of Molar Extinction coefficient of compound 4 in buffer & DMSO

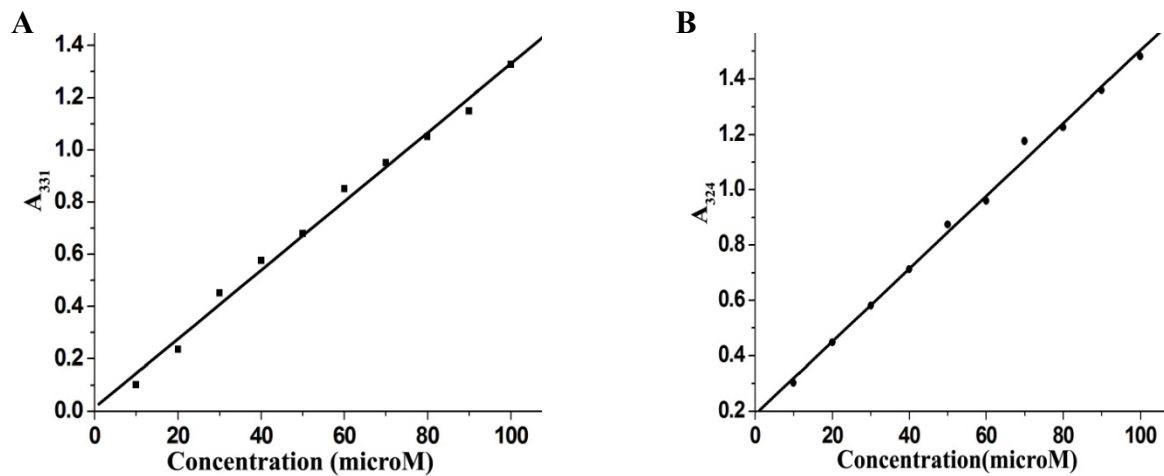

Fig 8. (A) Plot of Absorbance (331nm) vs. Concentration (micro M) for 4 in DMSO.

(B) Plot of Absorbance (324nm) vs. Concentration (microM) for 4 in buffer;

## Determination of Quantum Yield of 4

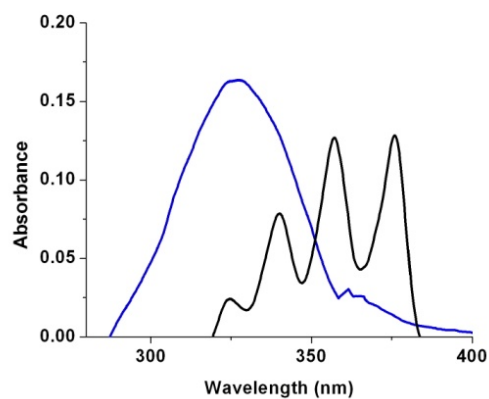

Absorbance spectrum of anthracene in cyclohexane solution (black) and compound 4 in aqueous sodium cacodylate buffer solution (blue).

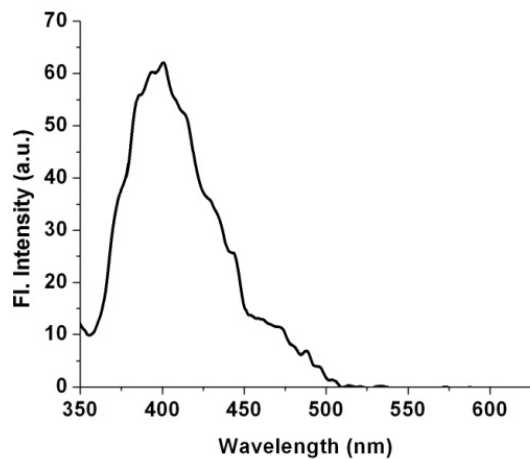

Fluorescence spectrum of 4 in aqueous buffer solution ( $\lambda_{\text{ex}} = 331 \text{ nm}$ .)

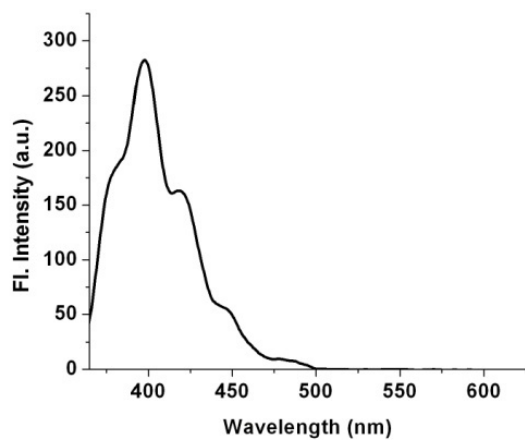

Fluorescence spectrum of anthracene in cyclohexane solution ( $\lambda_{\text{ex}} = 356 \text{ nm.}$ )

Co-ordinates of standard orientation of **4** obtained from DFT calculation

| Center<br>Number | Atomic<br>Number | Atomic<br>Type | Coordinates (Angstroms) |           |           |
|------------------|------------------|----------------|-------------------------|-----------|-----------|
|                  |                  |                | X                       | Y         | Z         |
| 1                | 6                | 0              | 0.227400                | -0.156300 | -0.325700 |
| 2                | 6                | 0              | 0.249900                | -1.561000 | -0.353500 |
| 3                | 6                | 0              | 1.496500                | -2.208100 | -0.293200 |
| 4                | 6                | 0              | 2.713400                | -1.502400 | -0.254900 |
| 5                | 6                | 0              | 2.670600                | -0.098000 | -0.239800 |
| 6                | 6                | 0              | 1.427100                | 0.550000  | -0.258600 |
| 7                | 8                | 0              | 3.883800                | -2.210300 | -0.225900 |
| 8                | 6                | 0              | 5.047300                | -1.507900 | -0.206400 |
| 9                | 6                | 0              | 5.081400                | -0.030400 | -0.197600 |
| 10               | 6                | 0              | 3.924000                | 0.669300  | -0.211100 |
| 11               | 6                | 0              | 3.948400                | 2.179400  | -0.216000 |
| 12               | 8                | 0              | 6.123300                | -2.102800 | -0.198900 |
| 13               | 6                | 0              | -1.081600               | 0.598800  | -0.439400 |
| 14               | 6                | 0              | -2.306000               | -0.354200 | -0.480200 |
| 15               | 6                | 0              | -2.007700               | -1.658900 | 0.243200  |
| 16               | 8                | 0              | -0.906600               | -2.294000 | -0.342900 |
| 17               | 8                | 0              | -1.305900               | 1.464900  | 0.680200  |
| 18               | 6                | 0              | -2.654900               | 1.473700  | 0.975800  |
| 19               | 6                | 0              | -3.307000               | 0.451800  | 0.296400  |
| 20               | 6                | 0              | -3.344200               | 2.356700  | 1.806000  |
| 21               | 6                | 0              | -4.726400               | 2.184100  | 1.929100  |
| 22               | 6                | 0              | -5.387500               | 1.158300  | 1.239900  |
| 23               | 6                | 0              | -4.682300               | 0.273200  | 0.417500  |
| 24               | 6                | 0              | -1.089600               | 1.486100  | -1.701400 |
| 25               | 6                | 0              | 1.568500                | -3.722400 | -0.287400 |
| 26               | 1                | 0              | 1.381800                | 1.648800  | -0.233600 |
| 27               | 1                | 0              | 6.054100                | 0.486400  | -0.184900 |
| 28               | 1                | 0              | 4.982600                | 2.589500  | -0.238400 |
| 29               | 1                | 0              | 3.426800                | 2.575600  | -1.116400 |
| 30               | 1                | 0              | 3.457700                | 2.580200  | 0.699500  |
| 31               | 1                | 0              | -2.652400               | -0.554700 | -1.520000 |
| 32               | 1                | 0              | -2.877500               | -2.352600 | 0.176600  |
| 33               | 1                | 0              | -1.785700               | -1.489400 | 1.322600  |
| 34               | 1                | 0              | -2.815600               | 3.164800  | 2.333800  |
| 35               | 1                | 0              | -5.303700               | 2.868100  | 2.572400  |
| 36               | 1                | 0              | -6.478300               | 1.043300  | 1.350000  |
| 37               | 1                | 0              | -5.191700               | -0.542300 | -0.118000 |
| 38               | 1                | 0              | -2.072800               | 1.991000  | -1.838900 |
| 39               | 1                | 0              | -0.324100               | 2.292100  | -1.655500 |
| 40               | 1                | 0              | -0.890700               | 0.880600  | -2.615000 |
| 41               | 1                | 0              | 0.584500                | -4.224600 | -0.403500 |
| 42               | 1                | 0              | 2.204700                | -4.083400 | -1.127100 |
| 43               | 1                | 0              | 2.010000                | -4.079600 | 0.670800  |



### Fluorescence titration of compound 4 with different nucleotides

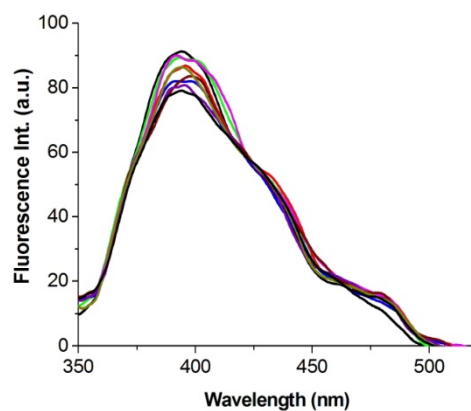

Figure 9. Fluorescence emission of ligand 4 (10 nM) in presence of increasing concentration of AMP (0-10 μM).

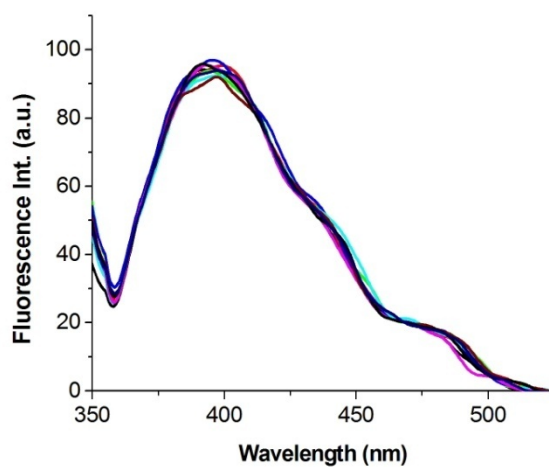

Figure 10. Fluorescence emission of ligand 4 (10 nM) in presence of increasing concentration of CMP (0-10 μM).

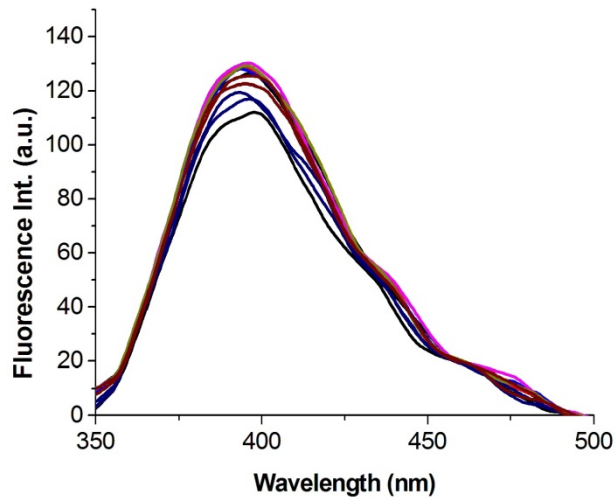

Figure 11. Fluorescence emission of ligand 4 (10 nM) in presence of increasing concentration of GMP (0-10 μM).

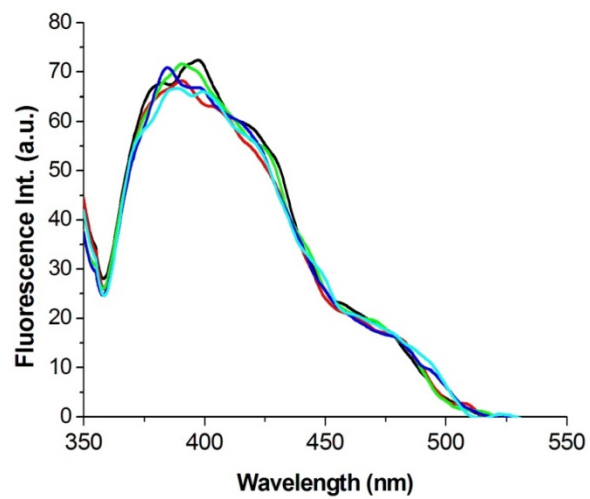

Figure 12. Fluorescence emission of ligand **4** (10 nM) in presence of increasing concentration of TMP (0, 1, 2, 3, 13  $\mu\text{M}$ ).

## Determination of detection limit of compound 4

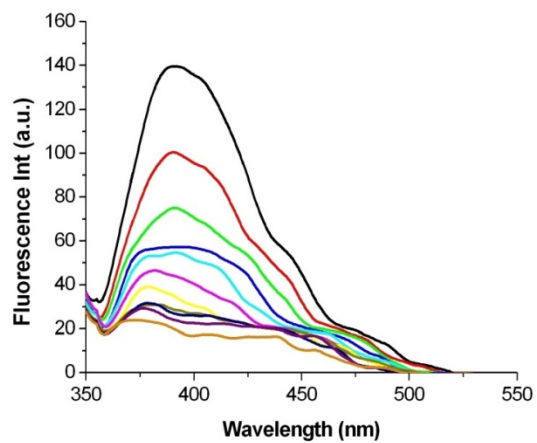

Figure 13. Emission spectra of ligand 4 in presence of ct-DNA with gradual dilution keeping  $[\text{ligand}]/[\text{DNA}] = 1:100$  ( $[\text{DNA}] = 1000 \text{ nM}, 500 \text{ nM}, 250 \text{ nM}, 125 \text{ nM}$  up to  $3.9 \text{ nM}$ ). The most underneath spectra (dark yellow) is due to noise obtained from buffer solution only. For all the spectra  $\lambda_{\text{ex}} = 331 \text{ nm}$ .

### Fluorescence titration of compound 4 with a sequence of DNA

Compound 4 (20 nM) was excited at 331 nm and emission spectra were recorded. Then oligonucleotide d(5'-CATGGCCATG-3')<sub>2</sub> was added (from 0 to 10 μM) gradually to this solution, mixed thoroughly after each addition and the corresponding emission spectrum was recorded.

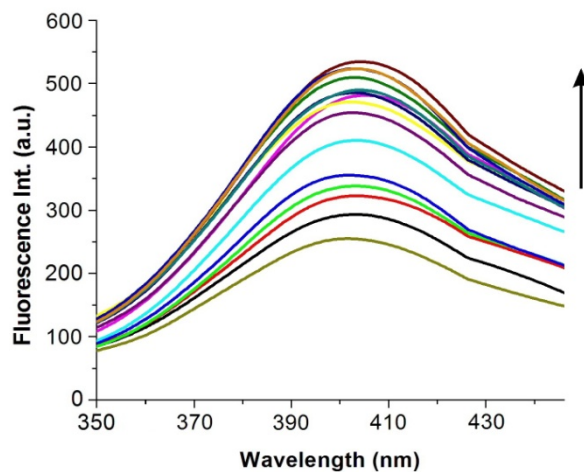

**Figure 14.** Emission spectra of compound 4 (20 nM) in presence of increasing concentration of d(5'-CATGGCCATG-3')<sub>2</sub> up to 10 μM.
